# Supplementary material for: Improved protocol for efficacious in vitro androgenesis and development of doubled haploids in temperate japonica rice
Source: PLoS One. 2020 Nov 2;15(11):e0241292. doi: 10.1371/journal.pone.0241292 (PMC7605686; doi:10.1371/journal.pone.0241292)
Supplement: S1 File — (XLSX) [file pone.0241292.s008.xlsx]

## Sheet: Sheet1
S1 File. Main and interaction effects pronounced by Cold pre-treatment (CP) and Boot emergence stage (BES) on plant regeneration
			BES4-6	BES7-10	BES11-13	BES>13	Mean (CP)	S.E.	C.D. (P<0.05)	F Prob.
F1	Green plant regeneration	CP2	0.01 (0.0) Cc	1.44 (27.3) A a	0.96 (9.1) B b	0.01 (0.0) Cc	0.60 a	0.168	0.481	0.022
		CP4	0.01 (0.0) Cc	1.78 (60.6) A a	1.66 (45.5) A a	1.44 (27.3) B b	1.22 b	0.255	0.729	0.006
		CP6	0.01 (0.0) B b	1.68 (47.6) A a	1.44 (27.3) A a	1.26 (18.2) A a	1.09 b	0.215	0.615	0
		CP8	0.01 (0.0) A	0.96 (9.1) B	0.01 (0.0) A	0.01 (0.0) A	0.24 c	0.091	_	0.403
		Mean	0.01 A	1.46 B	1.017 C	0.68 D	0.79	0.096	0.269	0
	Albino regeneration	CP2	0.01 (0.0) A	0.96 (9.1) A	0.96 (9.1) A	0.01 (0.0) A	0.48 a	0.138	-	0.323
		CP4	0.01 (0.0) A	1.08 (12.1) A	1.26 (18.2) A	1.26 (18.2) A	0.90 bc	0.207	-	0.395
		CP6	0.01 (0.0) B b	1.55 (35.2) A a	1.69 (48.5) A a	1.26 (18.2) A a	1.12 b	0.22	0.628	0
		CP8	0.01 (0.0) B b	1.74 (54.5) A a	1.56 (36.4) A a	0.01 (0.0) B b	0.83 c	0.219	0.626	0.001
		Mean	0.01 A	1.33 B	1.36 B	0.63 C	0.83	0.099	0.278	0
	Total regeneration	CP2	0.01 (0.0) B b	1.56 (36.4) A a	1.26 (18.2) A a	0.01 (0.0) B b	0.71 a	0.195	0.557	0.034
		CP4	0.01 (0.0) B b	1.86 (72.7) A a	1.80 (63.6) A a	1.66 (45.5) A a	1.33 b	0.26	0.744	0.001
		CP6	0.01 (0.0) C c	1.94 (82.7) A a	1.88 (75.8) A a	1.56 (36.4) B b	1.34 b	0.214	0.612	0
		CP8	0.01 (0.0) B b	1.80 (63.6) A a	1.56 (36.4) A a	0.01 (0.0) B b	0.84 a	0.215	0.615	0
		Mean	0.01 A	1.79 B	1.625 B	0.81 C	1.06	0.111	0.311	0
K-332	Green plant regeneration	CP2	0.01 (0.0) C	1.26 (18.2) A	0.96 (9.1) B	0.01 (0.0) C	0.56 a	0.156	_	0.104
		CP4	0.01 (0.0) Cc	1.68 (47.7) A a	1.44 (27.3) A ab	0.96 (9.1) B ab	1.02 b	0.22	0.628	0.003
		CP6	0.01 (0.0) B b	1.48 (30.0) A a	1.36 (22.7) A a	0.96 (9.1) A a	0.95 b	0.188	0.538	0
		CP8	0.01 (0.0) B	0.96 (9.1) A	0.01 (0.0) B	0.01 (0.0) B	0.24 a	0.091	_	0.403
		Mean	0.01 A	1.34 B	0.94 C	0.48 A	0.69	0.085	0.238	0
	Albino regeneration	CP2	0.01 (0.0) A	1.13 (13.6) A	0.96 (9.1) A	0.01 (0.0) A	0.52 a	0.145	-	0.305
		CP4	0.01 (0.0) A	0.84 (6.88) A	1.28 (18.91) A	0.96 (9.1) A	0.77 b	0.182	-	0.3
		CP6	0.01 (0.0) B b	0.79 (6.1) A a	1.26 (18.2) A a	0.96 (9.1) A a	0.75 ab	0.201	0.575	0.001
		CP8	0.01 (0.0) B b	1.66 (45.5) A a	1.66 (45.5) A a	0.01 (0.0) B b	0.83 b	0.223	0.636	0.003
		Mean	0.01 A	1.10 B	1.29 B	0.485 C	0.72	0.095	0.265	0
	Total regeneration	CP2	0.01 (0.0) B b	1.50 (31.8) A a	1.26 (18.2) A a	0.01 (0.0) B b	0.69 a	0.191	0.546	0.037
		CP4	0.01 (0.0) B b	1.73 (53.8) A a	1.66 (45.5) A a	1.26 (18.2) A a	1.16 b	0.239	0.682	0.002
		CP6	0.01 (0.0) B b	1.71 (50.9) A a	1.71 (51.5) A a	1.43 (27.3) A a	1.21 b	0.197	0.562	0
		CP8	0.01 (0.0) B b	1.74 (54.5) A a	1.66 (45.5) A a	0.01 (0.0) B b	0.85 a	0.223	0.636	0.001
		Mean	0.01 A	1.67 B	1.572 B	0.67 C	0.98	0.107	0.298	0
GS-88	Green plant regeneration	CP2	0.01 (0.0) B	0.96 (9.1) A	0.01 (0.0) B	0.01 (0.0) B	0.24 A	0.104	_	0.1
		CP4	0.01 (0.0) B b	1.68 (47.7) A a	1.44 (27.3) A a	0.01 (0.0) B b	0.785 B	0.2	0.571	0
		CP6	0.01 (0.0) C c	1.64 (43.9) A a	1.44 (27.3) A a	0.96 (9.1) B ab	1.0125 C	0.199	0.568	0
		CP8	0.01 (0.0) B	0.96 (9.1) A	0.01 (0.0) B	0.01 (0.0) B	0.24 A	0.091	_	0.403
		Mean	0.01 A	1.31 B	0.725 C	0.24 D	0.57	0.078	0.219	0
	Albino regeneration	CP2	0.01 (0.0) A	0.65 (4.5) B	0.96 (9.1) C	0.01 (0.0) A	0.40 a	0.119	_	0.575
		CP4	0.01 (0.0) A	0.88 (7.6) A	1.26 (18.2) A	0.96 (9.1) A	0.77 b	0.181	_	0.52
		CP6	0.01 (0.0) B b	1.39 (24.2) Aa	1.54 (34.8) Aa	1.26 (18.2) Aa	1.05 c	0.215	0.614	0.002
		CP8	0.01 (0.0) B b	1.50 (31.8) A a	1.44 (27.3) A a	0.01 (0.0) B b	0.74 b	0.204	0.582	0.033
		Mean	0.01 B	1.10 B	1.3 C	0.56 A	0.74	0.092	0.256	0
	Total regeneration	CP2	0.01 (0.0) A	1.13 (13.6) A	0.96 (9.1) A	0.01 (0.0) A	0.52 a	0.145	_	0.305
		CP4	0.01 (0.0) Cc	1.74 (55.3) A a	1.66 (45.5) A a	0.96 (9.1) B b	1.09 b	0.225	0.643	0
		CP6	0.01 (0.0) B b	1.83 (68.2) A a	1.79 (62.1) A a	1.44 (27.3) A a	1.26 b	0.202	0.579	0
		CP8	0.01 (0.0) B b	1.61 (40.9) A a	1.44 (27.3) A a	0.01 (0.0) B b	0.76 a	0.208	0.595	0.01
		Mean	0.01 A	1.57 B	1.46 B	0.60 C	0.91	0.099	0.276	0
	* Refer text for details
