# Supplementary material for: Improved protocol for efficacious in vitro androgenesis and development of doubled haploids in temperate japonica rice
Source: PLOS journal article supplement (doi:10.1371/journal.pone.0241292), 2020-11-02

**S4 Fig. The process of hardening of anther culture derived plantlets**

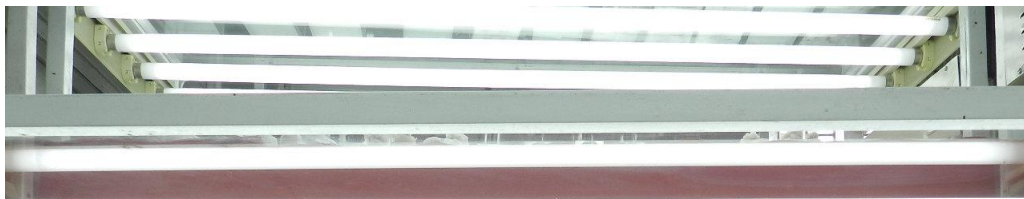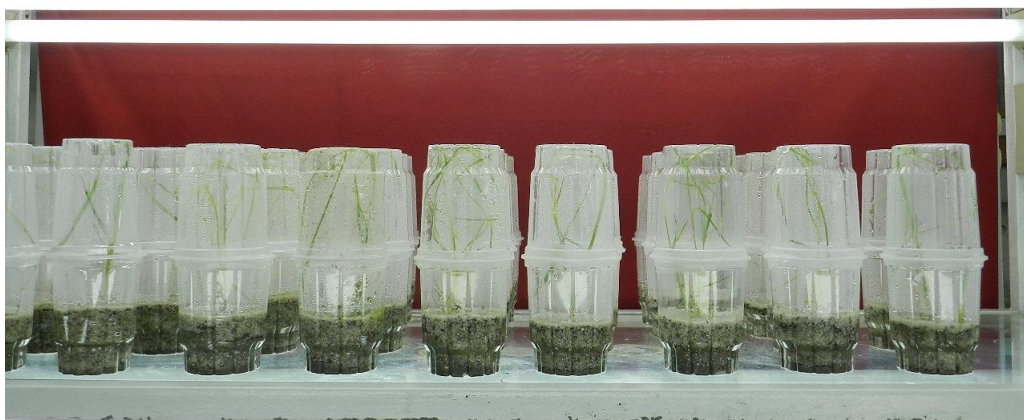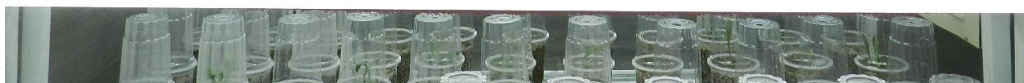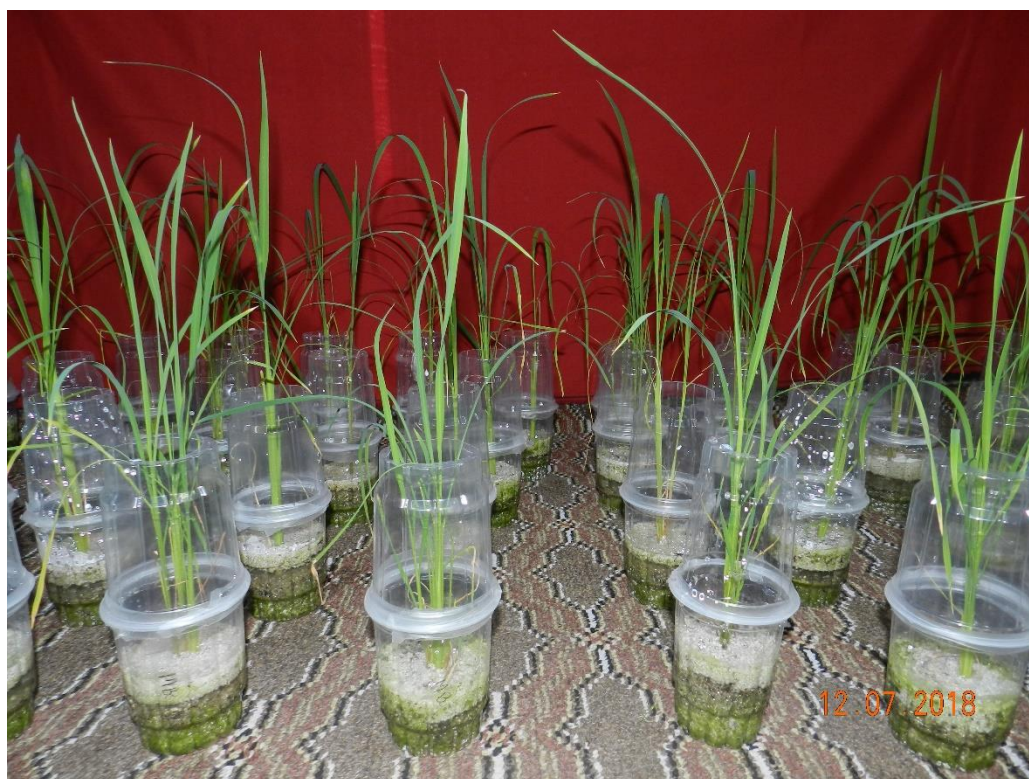

Supplement: S4 (10.1371/journal.pone.0241292.s004) [file journal.pone.0241292.s004]
